# Supplementary material for: Aptamer-functionalized AuNCs nanogel for targeted delivery of docosahexaenoic acid to induce browning of white adipocytes
Source: Royal Society of Chemistry journal article supplement (doi:10.1039/d2tb02709g), 2023-01-01
Supplement: d2tb02709g1.pdf [file d2tb02709g1.pdf]

## **Electronic Supplementary Information (ESI)**

### **Aptamer-Functionalized AuNCs Nanogel for Targeted Delivery of Docosahexaenoic Acid to Induce Browning of White Adipocytes**

Hejie Xu, Jialuo Ding, Yanhui Du, Le Li, Yeying Li, Mengyuan Zhao, Yu Su, and  
Zhenkun Lin\*

Research Center of Basic Medicine, The Second Affiliated Hospital of Wenzhou  
Medical University, Wenzhou 325027, China.

\* Corresponding author. E-mail address: zklin@wmu.edu.cn (Z. Lin)

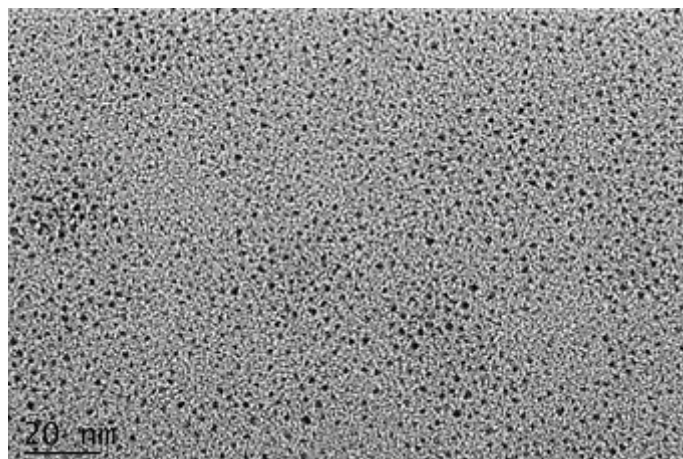

**Fig. S1** TEM image of AuNCs.

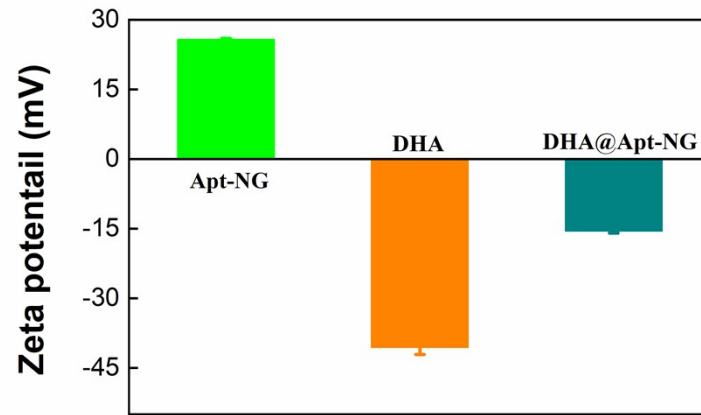

Fig. S2 Zeta potentials of Apt-NG, DHA, and DHA@Apt-NG.

**Table S1:** Information for the primer sequences used in quantitative real-time PCR.

| Gene          | Forward Primer (5'-3') | Reverse Primer (5'-3')      |
|---------------|------------------------|-----------------------------|
| <i>Gapdh</i>  | AGGTCGGTGTGAACGGATTTG  | TGTAGACCATGTAGTTGAGGTC<br>A |
| <i>Ucp1</i>   | AGGCTTCCAGTACCATTAGGT  | CTGAGTGAGGCAAAGCTGATTT      |
| <i>Pgc-1α</i> | AGCCGTGACCACTGACAACGAG | GCTGCATGGTTCTGAGTGCTAA<br>G |
| <i>Prdm16</i> | CCACCAGCGAGGACTTCAC    | GGAGGACTCTCGTAGCTCGAA       |
| <i>Pparg</i>  | GTGCCAGTTTCGATCCGTAGA  | GGCCAGCATCGTGTAGATGA        |
